# Supplementary material for: Decreasing, not increasing, leaf area will raise crop yields under global atmospheric change
Source: PubMed Central journal article supplement — Glob Chang Biol. 2016 Nov 17;23(4):1626–35. doi: 10.1111/gcb.13526 (PMC5347850; doi:10.1111/gcb.13526), 2016-11-17
Supplement: GCB-23-1626-s001.pdf [file GCB-23-1626-s001.pdf]

# Supporting information:

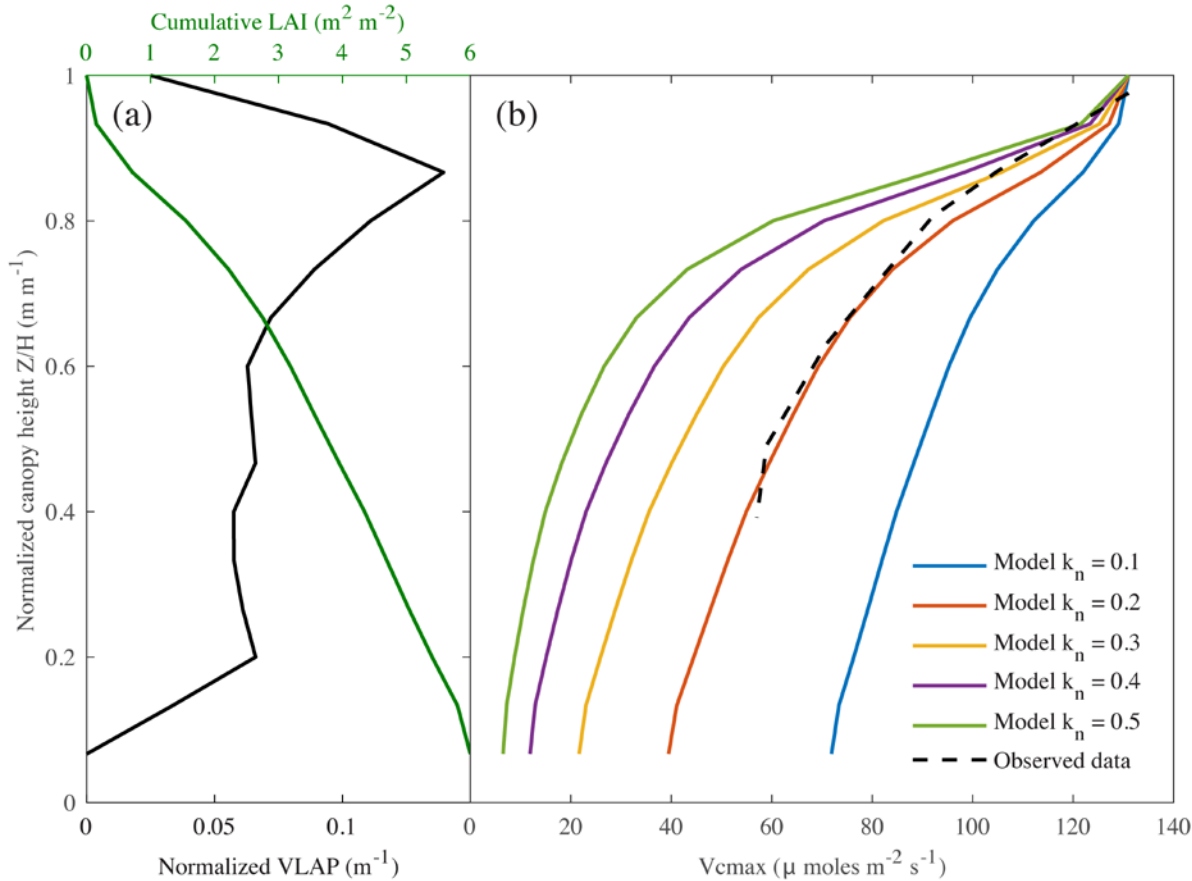

Supplementary Figure S1: Vertical distribution of leaf nitrogen (and hence  $V_{\text{max},25}$ ) in soybean canopies.  $Z/H$  is the ratio of the height  $Z$  to that of the canopy  $H$ , and represents normalized canopy height. Thus  $Z/H=1$  means top of the canopy and  $Z/H=0$  means bottom of the canopy. (a) Variation of normalized vertical leaf area profile (VLAP) (green line) and cumulative LAI (black line) as a function of normalized canopy height. The Normalized VLAP is computed by dividing the LAI at a given canopy height with the total LAI and has the units  $\text{m}^{-1}$ . (b) Variation of model predicted and observed  $V_{\text{max},25}$  as a function of canopy depth. A leaf nitrogen extinction coefficient of 0.2 fits the data well.

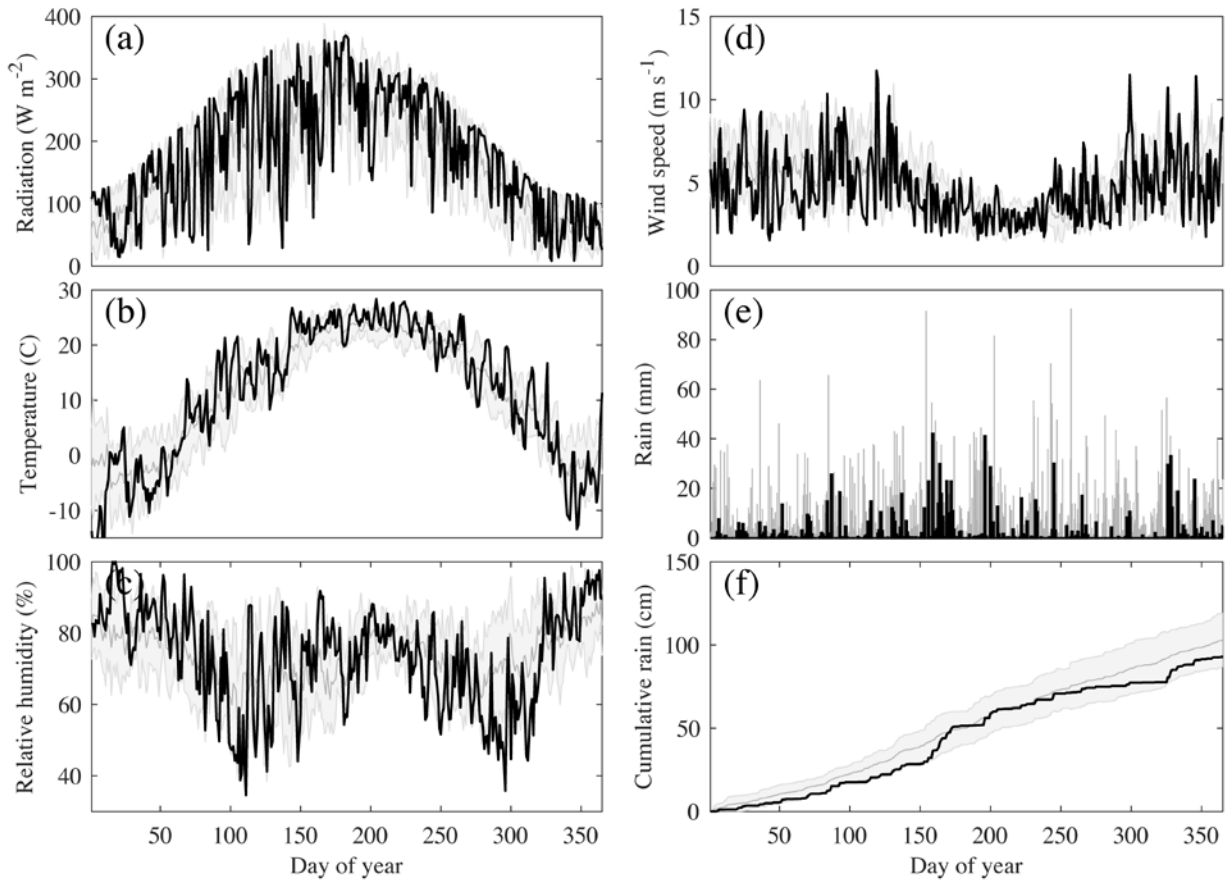

15

16 Supplementary Figure S2: SoyFACE weather data for year 2010 (black line) with average (grey  
17 line) and  $\pm 1$  s.e. (shaded grey region) across 9 years (2002-2010). (a) daily incoming shortwave  
18 radiation, (b) daily temperature, (c) daily relative humidity, (d) daily wind speed, (e) daily  
19 precipitation, and f cumulative daily total precipitation.

20

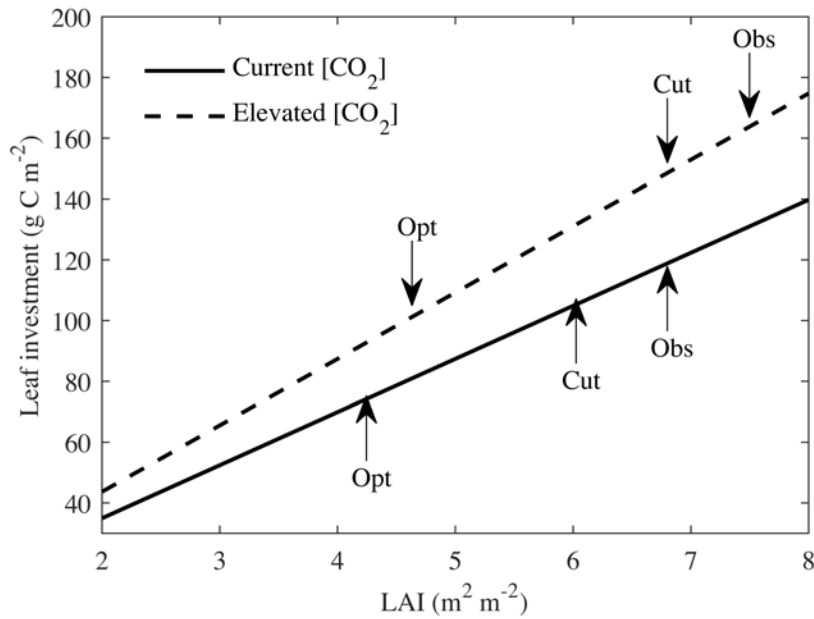

22

23 Supplementary Figure S3: Estimated leaf tissue construction carbon costs, as a function of LAI  
 24 in soybean plant canopies under current and elevated [CO<sub>2</sub>] (550 ppm). At optimal LAI, leaf  
 25 construction cost is lowered by 38% and 39% under current and elevated [CO<sub>2</sub>] respectively.  
 26 Experimentally decreased peak LAI, resulted in a decrease in leaf construction cost by 12% and  
 27 9% under current and elevated [CO<sub>2</sub>] respectively. The higher cost under elevated [CO<sub>2</sub>] results  
 28 from a higher mass per unit leaf area, based on measurement made at dawn when starch content was  
 29 negligible in both [CO<sub>2</sub>] treatments (Rogers et al. 2006).

30

31

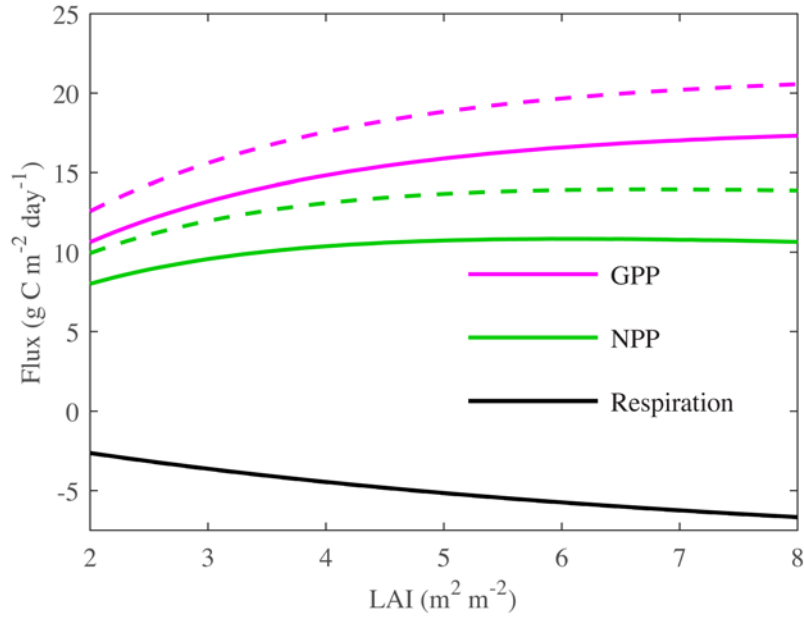

32

33 Supplementary Figure S4: Predicted variation in total photosynthetic canopy uptake of CO<sub>2</sub> (GPP),  
34 respiratory efflux (Respiration) and the net of these (NPP) as a function of LAI in current (solid  
35 lines) and elevated (dashed lines) [CO<sub>2</sub>]. MLCan models leaf respiration as a function of leaf  
36 nitrogen and this is lower under elevated [CO<sub>2</sub>]. MLCan does not take into account the differences  
37 in leaf thickness between ambient and elevated [CO<sub>2</sub>]. While there are differences in in leaf  
38 respiration between ambient and elevated [CO<sub>2</sub>], they are minor < 1% and are not apparent at this  
39 scale.

40

41

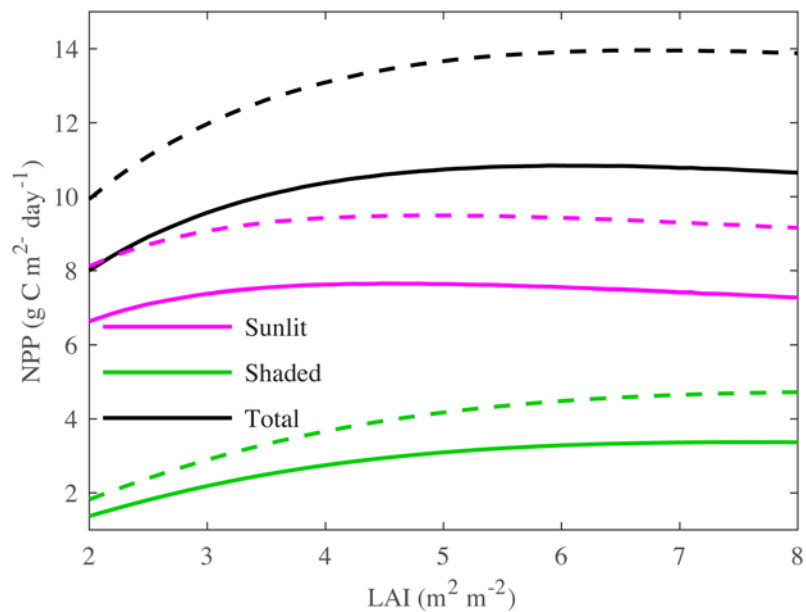

42

43 Supplementary figure S5: Individual and combined predicted contributions of average sunlit and  
44 shaded leaves to canopy NPP over a 24 h period as a function of LAI. Solid lines represent current  
45  $[\text{CO}_2]$  and dashed lines represent elevated  $[\text{CO}_2]$ .

46

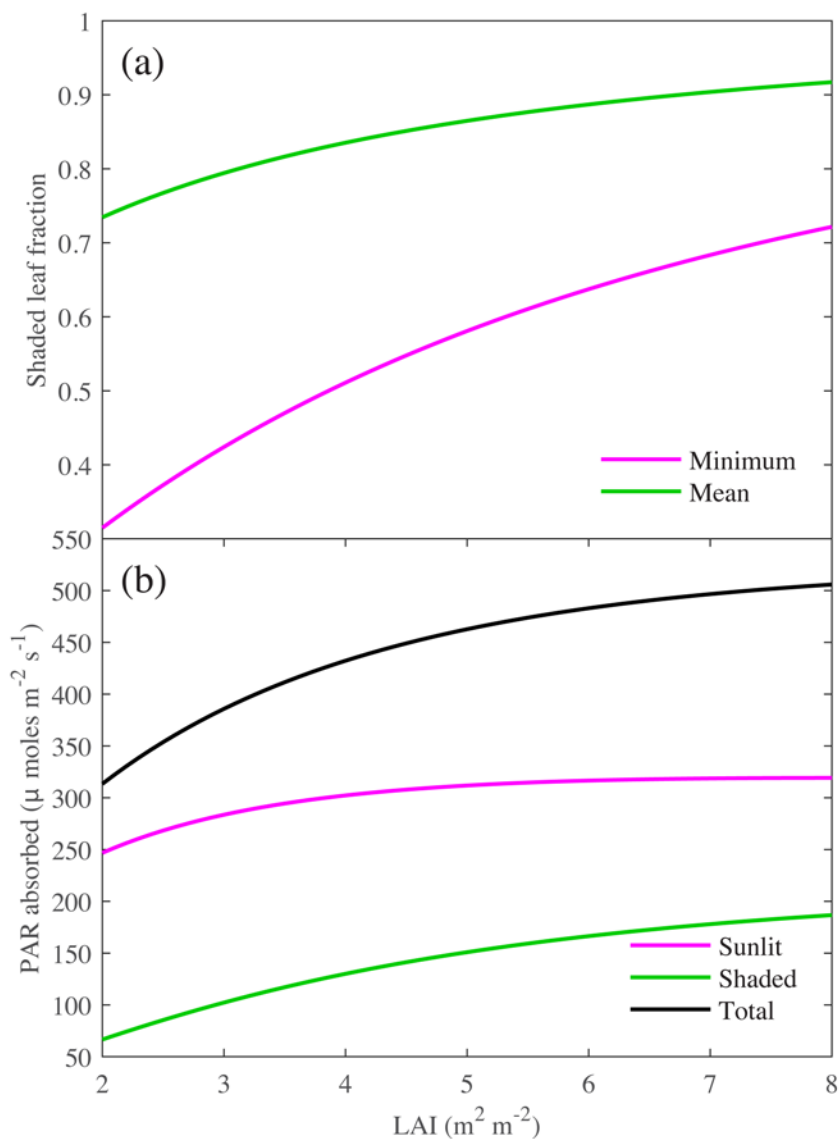

48

49 Supplementary Figure S6: Shading in soybean canopies. (a) Predicted variation of  
 50 the mean (24 h average) and minimum (solar noon) shaded leaf fraction as a function  
 51 of LAI. (b) Predicted separate and combined contributions of average sunlit and  
 52 shaded leaves to PAR absorbed over a 24 h period as a function of LAI.

53

54

55

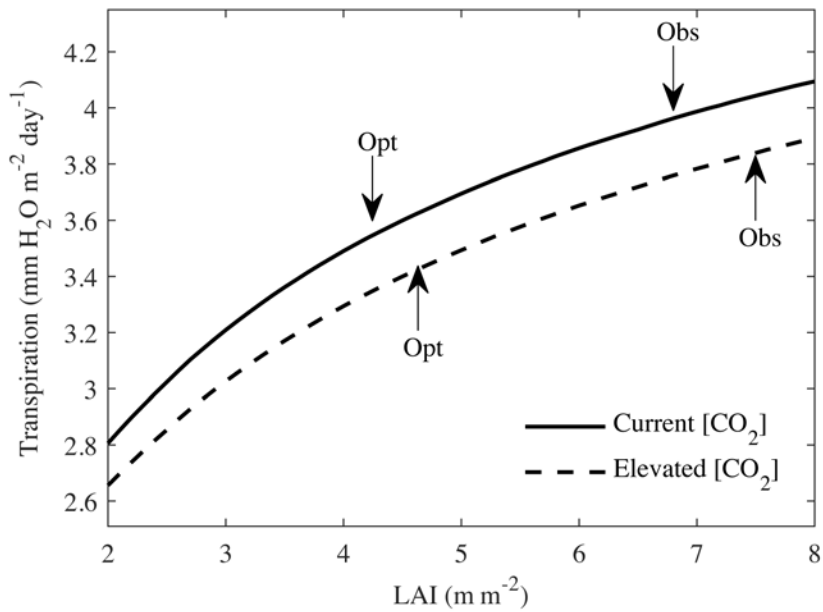

56

57 Supplementary Figure S7: Predicted total crop transpiration as a function of LAI. Solid lines  
58 represent current [CO<sub>2</sub>] and dashed lines represent elevated [CO<sub>2</sub>].
